# Supplementary material for: scaDA: A novel statistical method for differential analysis of single-cell chromatin accessibility sequencing data
Source: PubMed Central journal article supplement (PMC11324137; doi:10.1371/journal.pcbi.1011854), 2024-08-02
Supplement: pcbi.1011854.s001.pdf [file pcbi.1011854.s001.pdf]

## S1 Text. EM algorithm for ZINB model

The details for estimating mean, prevalence and dispersion parameters of ZINB model using EM algorithm are illustrated as follows.

The complete likelihood function is

$$\begin{aligned} L(\mathbf{y}_g, \mathbf{r}_g \mid \Theta) &= \prod_{i=1}^n f(y_{gi}, r_{gi} \mid \Theta) \\ &= \prod_{i=1}^n f(y_{gi} \mid r_{gi}, \Theta) f(r_{gi} \mid \Theta) \\ &= \prod_{i=1}^n f_{NB}(y_{gi} \mid \mu_g, \phi_g)^{(1-r_{gi})} p_g^{r_{gi}} (1-p_g)^{(1-r_{gi})} \end{aligned} \quad (1)$$

The complete log-likelihood function is

$$\ell_c(\mathbf{y}_g, \mathbf{r}_g \mid \Theta) = \sum_{i=1}^n r_{gi} \log(p_g) + (1-r_{gi}) \log(1-p_g) + (1-r_{gi}) \log(f_{NB}(y_{gi} \mid \mu_g, \phi_g)) \quad (2)$$

The E-step and M-step of the EM algorithm are

**E-step:**

$$\mathbb{E}[r_{gi}] = \frac{p_g \cdot \mathbf{1}_{(y_{gi}=0)}}{p_g \cdot \mathbf{1}_{(y_{gi}=0)} + (1-p_g) \cdot f_{NB}(0 \mid \mu_g, \phi_g)} \quad (3)$$

**M-step:**

$$p_g = \frac{1}{n} \sum_{i=1}^n \mathbb{E}[r_{gi}] \quad (4)$$

$$\mu_g, \phi_g = \arg \max \sum_{i=1}^n (1 - \mathbb{E}[r_{gi}]) \log(f_{NB}(y_{gi} \mid \mu_g, \phi_g)) \quad (5)$$
