# Supplementary material for: scaDA: A novel statistical method for differential analysis of single-cell chromatin accessibility sequencing data
Source: PubMed Central journal article supplement (PMC11324137; doi:10.1371/journal.pcbi.1011854), 2024-08-02
Supplement: pcbi.1011854.s002.pdf [file pcbi.1011854.s002.pdf]

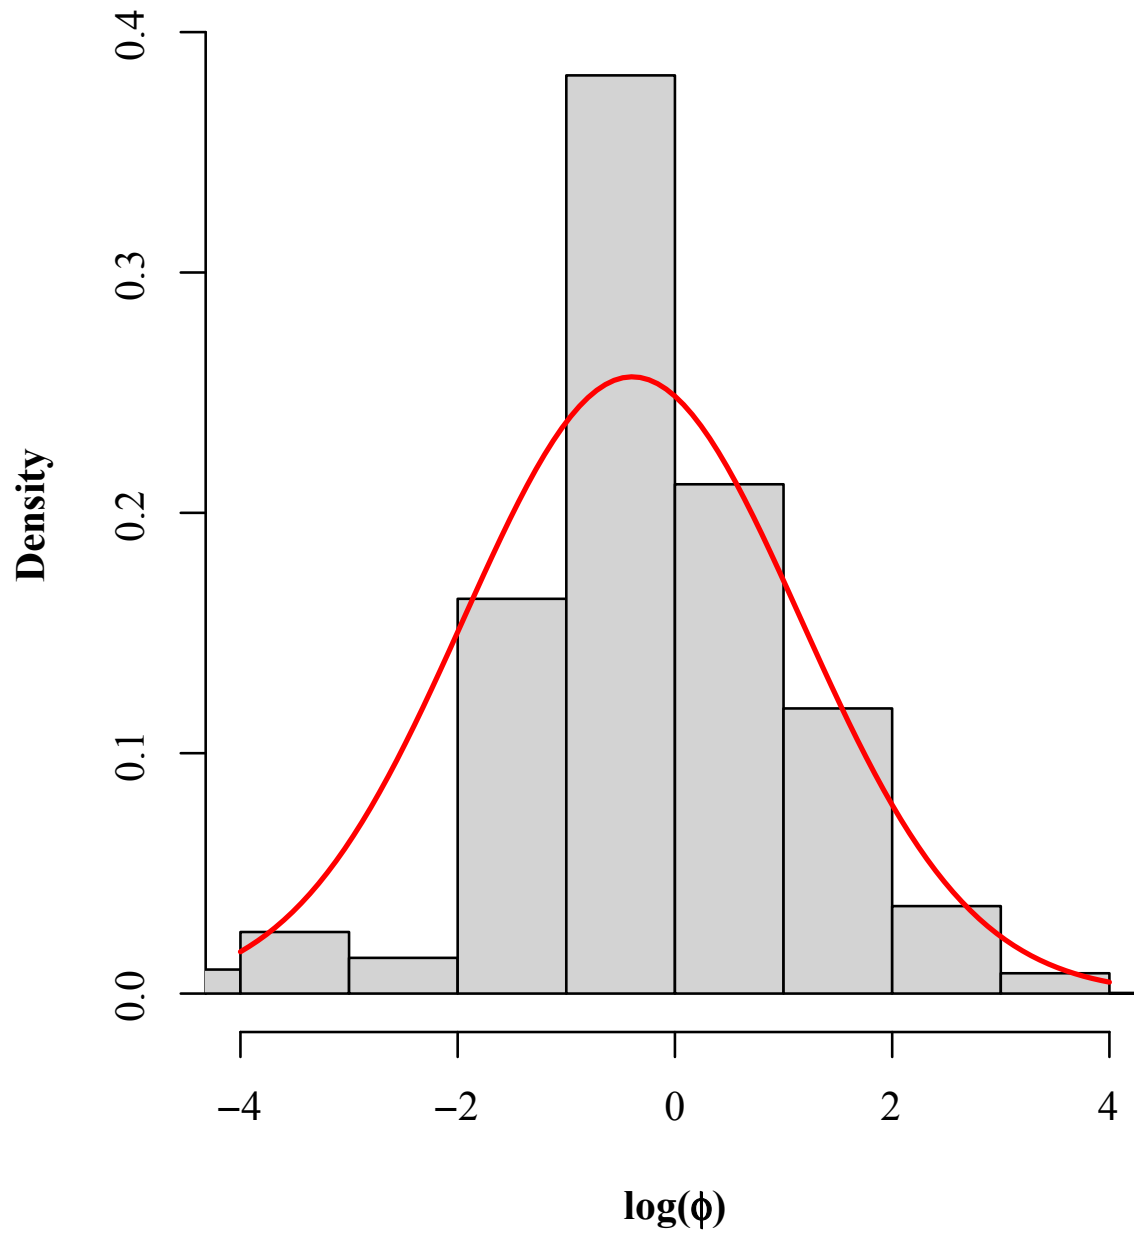

S1 Fig. Histogram of log-transformed dispersion estimates in granule neuron from “Human Brain 3K”
