# Supplementary material for: scaDA: A novel statistical method for differential analysis of single-cell chromatin accessibility sequencing data
Source: PubMed Central journal article supplement (PMC11324137; doi:10.1371/journal.pcbi.1011854), 2024-08-02
Supplement: pcbi.1011854.s007.pdf [file pcbi.1011854.s007.pdf]

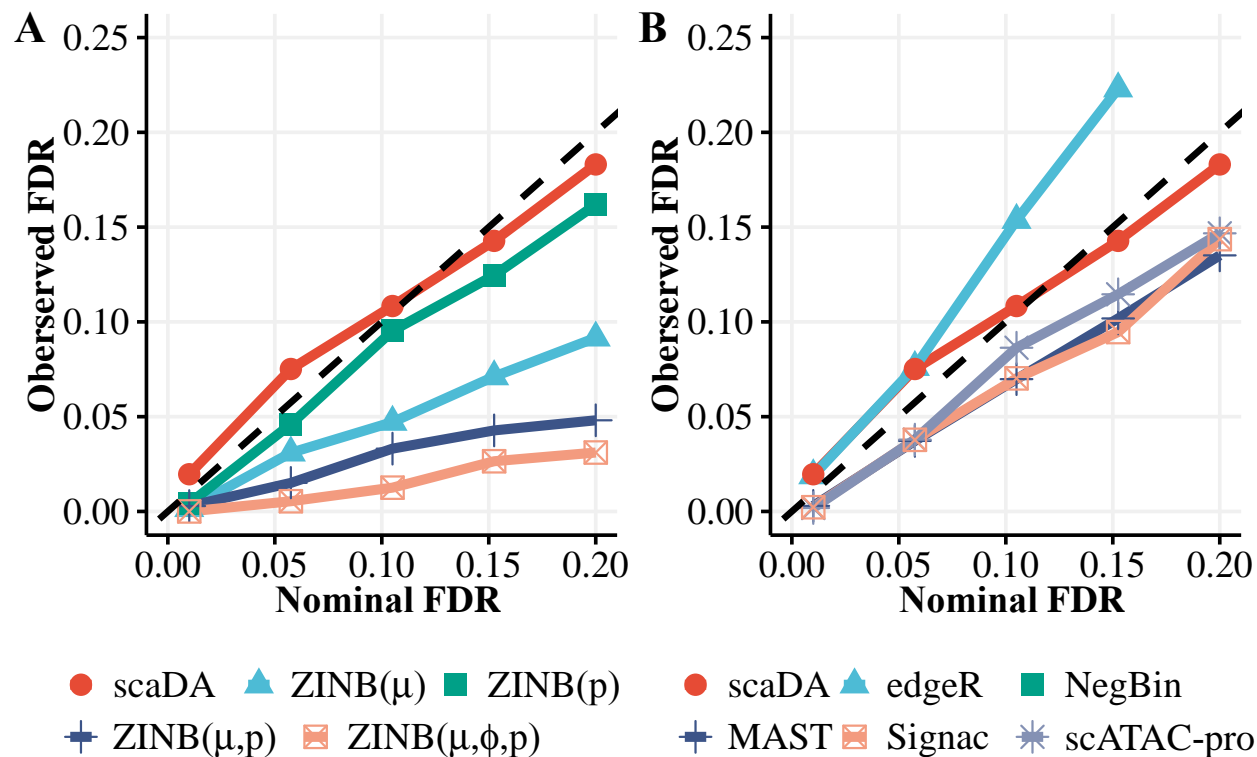

**S6 Fig. FDR control analysis (Sample size 200 in each group).** scaDA is compared to both ZINB-based LRTs and published methods. Using the same simulation strategy in Scenario 4 ( $\log_2\text{FC}=2.5$ ), we assume 20% DA peaks and simulate the read counts based on ZINB for 4000 peaks across 200 cells in each group. The observed FDR is plotted against the nominal FDR level. **A.** scaDA is compared to ZINB-based LRT tests. **B.** scaDA is compared to published methods.
