# Supplementary material for: scaDA: A novel statistical method for differential analysis of single-cell chromatin accessibility sequencing data
Source: PubMed Central journal article supplement (PMC11324137; doi:10.1371/journal.pcbi.1011854), 2024-08-02
Supplement: pcbi.1011854.s011.pdf [file pcbi.1011854.s011.pdf]

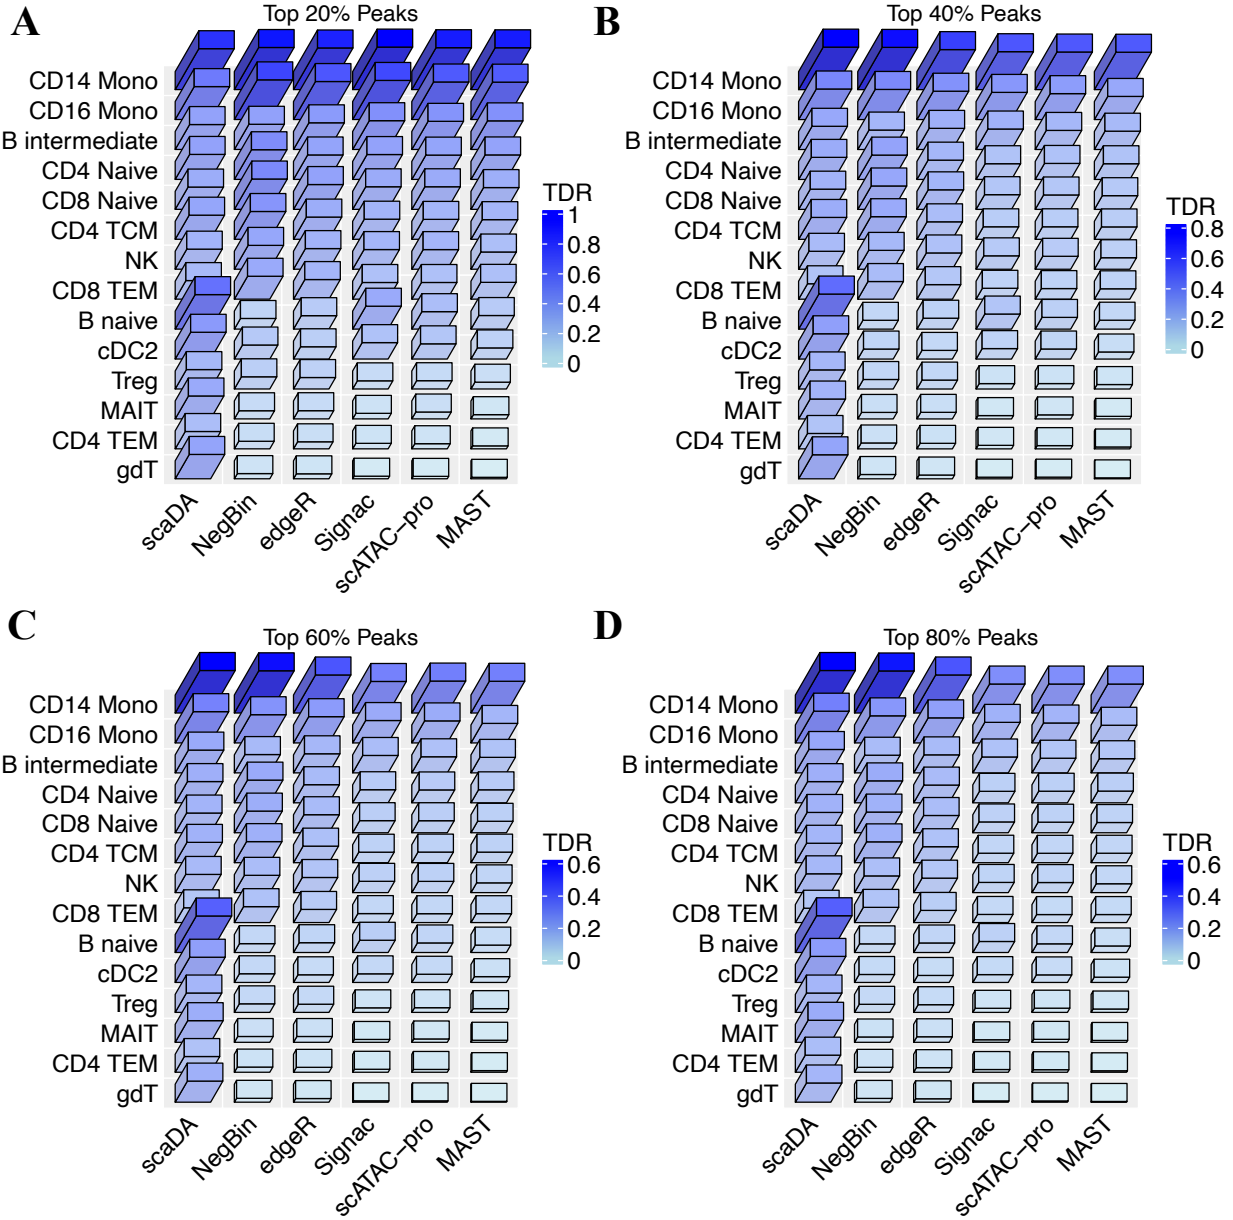

S10 Fig. Human PBMC 10K: TDR across 14 cell types for scaDA and published methods at different levels of top percentages (20%, 40%, 60%, 80%)
