# Supplementary material for: scaDA: A novel statistical method for differential analysis of single-cell chromatin accessibility sequencing data
Source: PubMed Central journal article supplement (PMC11324137; doi:10.1371/journal.pcbi.1011854), 2024-08-02
Supplement: pcbi.1011854.s013.pdf [file pcbi.1011854.s013.pdf]

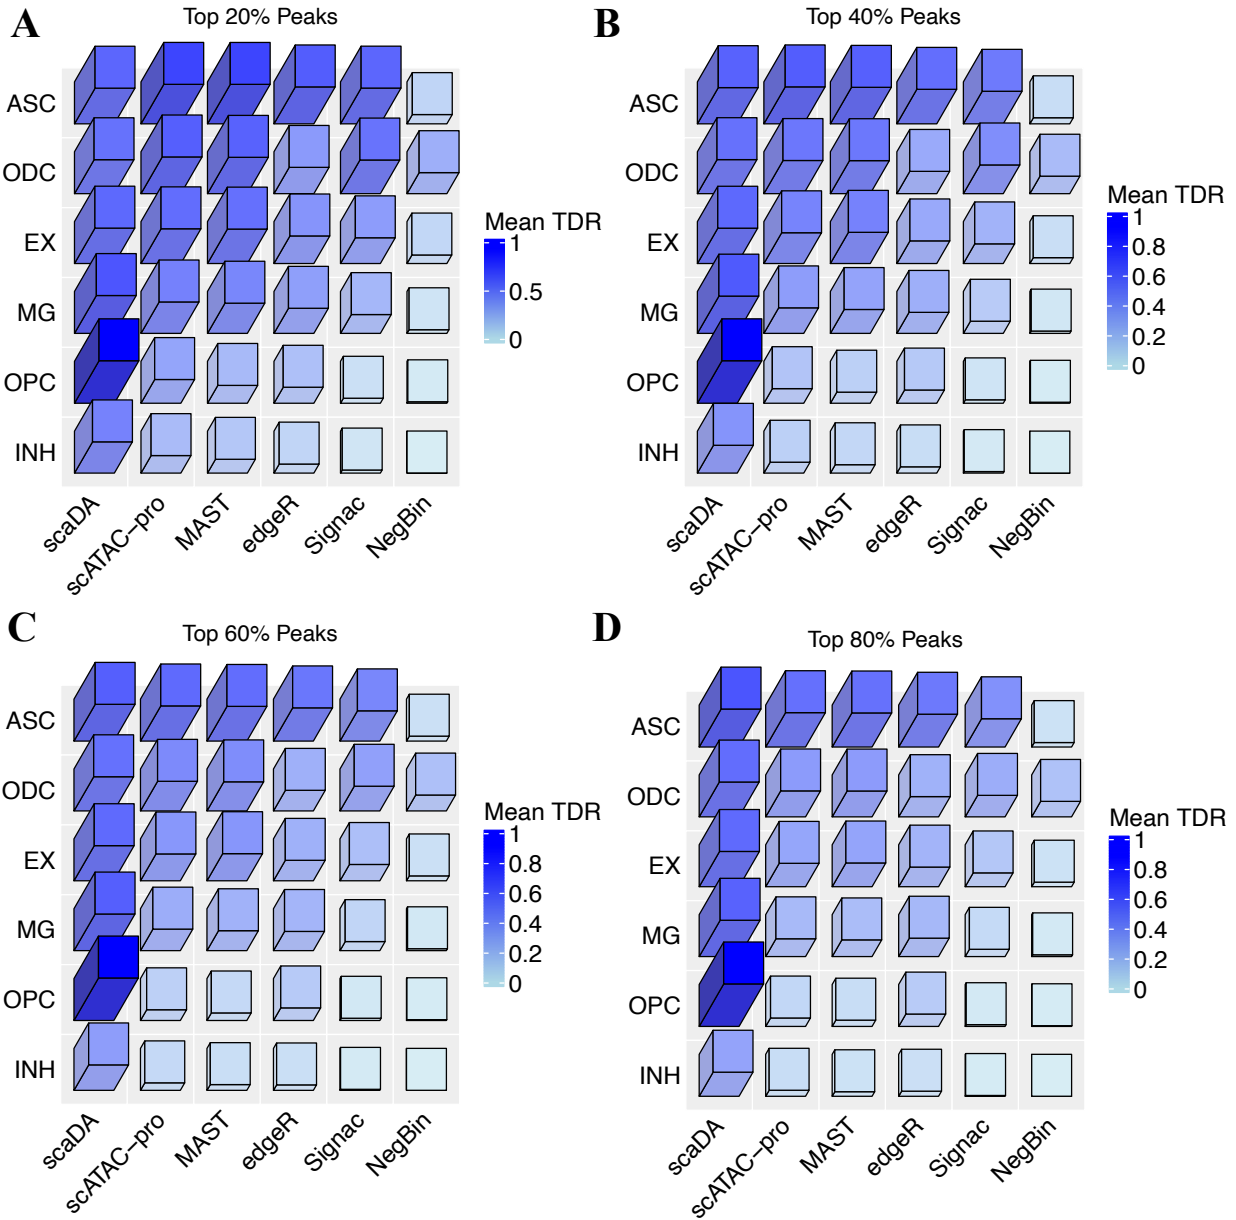

**S12 Fig. Human AD: TDR across 6 cell types for scaDA and published methods at different levels of top percentages (20%, 40%, 60%, 80%)**
