# Supplementary material for: scaDA: A novel statistical method for differential analysis of single-cell chromatin accessibility sequencing data
Source: PubMed Central journal article supplement (PMC11324137; doi:10.1371/journal.pcbi.1011854), 2024-08-02
Supplement: pcbi.1011854.s015.pdf [file pcbi.1011854.s015.pdf]

**S1 Table. Human Brain 3K: Cell types, cell numbers and cell type proportion**

| celltype        | cellnum | cell Proportion |
|-----------------|---------|-----------------|
| granule neuron  | 636     | 22%             |
| oligodendrocyte | 552     | 20%             |
| cOPC            | 365     | 13%             |
| bergmann glia   | 344     | 12%             |
| ependymal       | 204     | 7%              |
| purkinje cell   | 144     | 5%              |
| astrocytes      | 125     | 4%              |
| microglia       | 104     | 4%              |
| GCP             | 93      | 3%              |
| brainstem       | 73      | 3%              |
| MLI             | 69      | 2%              |
| rhombic lip     | 63      | 2%              |
| iCN             | 29      | 1%              |
| UBC             | 29      | 1%              |
