# Supplementary material for: scaDA: A novel statistical method for differential analysis of single-cell chromatin accessibility sequencing data
Source: PubMed Central journal article supplement (PMC11324137; doi:10.1371/journal.pcbi.1011854), 2024-08-02
Supplement: pcbi.1011854.s016.pdf [file pcbi.1011854.s016.pdf]

**S2 Table. Human Brain 3K: Mean of TDR across all cell types of scaDA and published methods at different levels of top percentages**

| Top Peaks | scaDA | Signac | scATAC-pro | MAST | NegBin | edgeR |
|-----------|-------|--------|------------|------|--------|-------|
| 20%       | 0.81  | 0.72   | 0.72       | 0.67 | 0.64   | 0.67  |
| 40%       | 0.73  | 0.58   | 0.58       | 0.56 | 0.42   | 0.54  |
| 60%       | 0.66  | 0.48   | 0.49       | 0.46 | 0.32   | 0.44  |
| 80%       | 0.59  | 0.42   | 0.42       | 0.40 | 0.26   | 0.35  |
| 100%      | 0.51  | 0.34   | 0.34       | 0.33 | 0.22   | 0.28  |
