# Supplementary material for: scaDA: A novel statistical method for differential analysis of single-cell chromatin accessibility sequencing data
Source: PubMed Central journal article supplement (PMC11324137; doi:10.1371/journal.pcbi.1011854), 2024-08-02
Supplement: pcbi.1011854.s017.pdf [file pcbi.1011854.s017.pdf]

**S3 Table. Human Brain 3K: Variance of TDR across all cell types of scaDA and published methods at different levels of top percentages**

| Top Peaks | scaDA | Signac | scATAC-pro | MAST | NegBin | edgeR |
|-----------|-------|--------|------------|------|--------|-------|
| 20%       | 0.03  | 0.09   | 0.08       | 0.10 | 0.05   | 0.08  |
| 40%       | 0.05  | 0.15   | 0.15       | 0.16 | 0.03   | 0.11  |
| 60%       | 0.05  | 0.15   | 0.15       | 0.15 | 0.02   | 0.09  |
| 80%       | 0.05  | 0.14   | 0.14       | 0.14 | 0.01   | 0.06  |
| 100%      | 0.03  | 0.09   | 0.09       | 0.10 | 0.01   | 0.03  |
