# Supplementary material for: scaDA: A novel statistical method for differential analysis of single-cell chromatin accessibility sequencing data
Source: PubMed Central journal article supplement (PMC11324137; doi:10.1371/journal.pcbi.1011854), 2024-08-02
Supplement: pcbi.1011854.s018.pdf [file pcbi.1011854.s018.pdf]

**S4 Table. Human Brain 3K: Rank of scaDA and published methods by power**

|        | scaDA | Signac | scATAC-pro | MAST | NegBin | edgeR |
|--------|-------|--------|------------|------|--------|-------|
| Rank 1 | 6     | 2      | 0          | 1    | 0      | 0     |
| Rank 2 | 0     | 1      | 2          | 0    | 3      | 1     |
| Rank 3 | 0     | 1      | 1          | 2    | 1      | 3     |
| Rank 4 | 2     | 3      | 2          | 0    | 0      | 1     |
| Rank 5 | 0     | 0      | 2          | 3    | 0      | 3     |
| Rank 6 | 0     | 1      | 1          | 2    | 4      | 0     |
