# Supplementary material for: scaDA: A novel statistical method for differential analysis of single-cell chromatin accessibility sequencing data
Source: PubMed Central journal article supplement (PMC11324137; doi:10.1371/journal.pcbi.1011854), 2024-08-02
Supplement: pcbi.1011854.s019.pdf [file pcbi.1011854.s019.pdf]

**S5 Table. Human PBMC 10K: Cell types, cell numbers and cell type proportion**

| celltype       | cellnum | cellprop |
|----------------|---------|----------|
| CD4 TCM        | 2303    | 27%      |
| CD14 Mono      | 2124    | 25%      |
| CD4 Naive      | 858     | 10%      |
| CD8 TEM        | 801     | 9%       |
| CD8 Naive      | 515     | 6%       |
| NK             | 336     | 4%       |
| B intermediate | 318     | 4%       |
| CD16 Mono      | 266     | 3%       |
| Treg           | 187     | 2%       |
| CD4 TEM        | 154     | 2%       |
| MAIT           | 144     | 2%       |
| cDC2           | 119     | 1%       |
| B naive        | 112     | 1%       |
| gdT            | 111     | 1%       |
| CD8 TCM        | 97      | 1%       |
| B memory       | 85      | 1%       |
| pDC            | 43      | 0%       |
| CD4 CTL        | 24      | 0%       |
| NK_CD56bright  | 21      | 0%       |
| Plasmablast    | 16      | 0%       |
