# Supplementary material for: scaDA: A novel statistical method for differential analysis of single-cell chromatin accessibility sequencing data
Source: PubMed Central journal article supplement (PMC11324137; doi:10.1371/journal.pcbi.1011854), 2024-08-02
Supplement: pcbi.1011854.s020.pdf [file pcbi.1011854.s020.pdf]

**S6 Table. Human PBMC 10K: Mean of TDR across all cell types for scaDA and published methods at different levels of top percentages**

| Top Peaks | scaDA | NegBin | edgeR | Signac | scATAC-pro | MAST |
|-----------|-------|--------|-------|--------|------------|------|
| 20%       | 0.57  | 0.49   | 0.45  | 0.45   | 0.43       | 0.40 |
| 40%       | 0.43  | 0.31   | 0.29  | 0.25   | 0.24       | 0.22 |
| 60%       | 0.34  | 0.24   | 0.21  | 0.17   | 0.16       | 0.15 |
| 80%       | 0.29  | 0.19   | 0.17  | 0.12   | 0.12       | 0.11 |
| 100%      | 0.24  | 0.16   | 0.14  | 0.10   | 0.10       | 0.09 |
