# Supplementary material for: scaDA: A novel statistical method for differential analysis of single-cell chromatin accessibility sequencing data
Source: PubMed Central journal article supplement (PMC11324137; doi:10.1371/journal.pcbi.1011854), 2024-08-02
Supplement: pcbi.1011854.s021.pdf [file pcbi.1011854.s021.pdf]

**S7 Table. Human PBMC 3K: Variance of TDR across all cell types for scaDA and published methods at different levels of top percentages**

| Top Peaks | scaDA | NegBin | edgeR | Signac | scATAC-pro | MAST |
|-----------|-------|--------|-------|--------|------------|------|
| 20%       | 0.02  | 0.07   | 0.06  | 0.07   | 0.07       | 0.08 |
| 40%       | 0.02  | 0.04   | 0.03  | 0.03   | 0.03       | 0.03 |
| 60%       | 0.01  | 0.02   | 0.02  | 0.01   | 0.01       | 0.01 |
| 80%       | 0.01  | 0.02   | 0.01  | 0.01   | 0.01       | 0.01 |
| 100%      | 0.01  | 0.01   | 0.01  | 0.01   | 0.01       | 0.01 |
