# Supplementary material for: scaDA: A novel statistical method for differential analysis of single-cell chromatin accessibility sequencing data
Source: PubMed Central journal article supplement (PMC11324137; doi:10.1371/journal.pcbi.1011854), 2024-08-02
Supplement: pcbi.1011854.s022.pdf [file pcbi.1011854.s022.pdf]

**S8 Table. Human Brain 3K: Rank of scaDA and published methods by power**

|        | scaDA | NegBin | edgeR | Signac | scATAC-pro | MAST |
|--------|-------|--------|-------|--------|------------|------|
| Rank 1 | 9     | 5      | 0     | 0      | 0          | 0    |
| Rank 2 | 5     | 8      | 1     | 1      | 0          | 0    |
| Rank 3 | 0     | 0      | 12    | 1      | 0          | 0    |
| Rank 4 | 0     | 1      | 0     | 10     | 6          | 4    |
| Rank 5 | 0     | 0      | 1     | 2      | 6          | 0    |
| Rank 6 | 0     | 0      | 0     | 0      | 2          | 10   |
