# Supplementary material for: scaDA: A novel statistical method for differential analysis of single-cell chromatin accessibility sequencing data
Source: PubMed Central journal article supplement (PMC11324137; doi:10.1371/journal.pcbi.1011854), 2024-08-02
Supplement: pcbi.1011854.s023.pdf [file pcbi.1011854.s023.pdf]

**S9 Table. Human AD: experimental design**

| Batch | Control    | Case      |
|-------|------------|-----------|
| 1     | Sample-96  | Sample-43 |
| 1     | Sample-100 | Sample-45 |
| 2     | Sample-82  | Sample-46 |
| 2     | Sample-66  | Sample-40 |
| 2     | Sample-101 | Sample-27 |
| 2     |            | Sample-50 |
| 2     |            | Sample-22 |
| 3     | Sample-90  | Sample-37 |
| 3     | Sample-52  | Sample-33 |
| 3     | Sample-58  | Sample-47 |
| 3     |            | Sample-17 |
| 3     |            | Sample-19 |
