# Supplementary material for: scaDA: A novel statistical method for differential analysis of single-cell chromatin accessibility sequencing data
Source: PubMed Central journal article supplement (PMC11324137; doi:10.1371/journal.pcbi.1011854), 2024-08-02
Supplement: pcbi.1011854.s024.pdf [file pcbi.1011854.s024.pdf]

**S10 Table. Human AD: Mean of TDR across all cell types for scaDA and published methods at different levels of top percentages**

| Top peaks | scaDA | scATAC-pro | MAST | edgeR | Signac | NegBin |
|-----------|-------|------------|------|-------|--------|--------|
| 20%       | 0.77  | 0.65       | 0.62 | 0.51  | 0.45   | 0.16   |
| 40%       | 0.75  | 0.54       | 0.52 | 0.43  | 0.35   | 0.12   |
| 60%       | 0.73  | 0.46       | 0.44 | 0.39  | 0.30   | 0.10   |
| 80%       | 0.71  | 0.40       | 0.38 | 0.37  | 0.25   | 0.09   |
| 100%      | 0.69  | 0.34       | 0.33 | 0.35  | 0.21   | 0.09   |
