# Supplementary material for: scaDA: A novel statistical method for differential analysis of single-cell chromatin accessibility sequencing data
Source: PubMed Central journal article supplement (PMC11324137; doi:10.1371/journal.pcbi.1011854), 2024-08-02
Supplement: pcbi.1011854.s025.pdf [file pcbi.1011854.s025.pdf]

**S11 Table. Human AD: Variance of TDR across all cell types for scaDA and published methods at different levels of top percentages**

| Top peaks | scaDA | scATAC-pro | MAST | edgeR | Signac | NegBin |
|-----------|-------|------------|------|-------|--------|--------|
| 20%       | 0.10  | 0.17       | 0.17 | 0.16  | 0.19   | 0.07   |
| 40%       | 0.10  | 0.17       | 0.17 | 0.14  | 0.17   | 0.05   |
| 60%       | 0.10  | 0.16       | 0.16 | 0.13  | 0.14   | 0.04   |
| 80%       | 0.10  | 0.14       | 0.14 | 0.12  | 0.12   | 0.04   |
| 100%      | 0.09  | 0.11       | 0.11 | 0.11  | 0.09   | 0.04   |
