# Supplementary material for: scaDA: A novel statistical method for differential analysis of single-cell chromatin accessibility sequencing data
Source: PubMed Central journal article supplement (PMC11324137; doi:10.1371/journal.pcbi.1011854), 2024-08-02
Supplement: pcbi.1011854.s026.pdf [file pcbi.1011854.s026.pdf]

**S12 Table. Human AD: Rank of scaDA and published methods by mean power**

|        | scaDA | scATAC-pro | MAST | edgeR | Signac | NegBin |
|--------|-------|------------|------|-------|--------|--------|
| Rank 1 | 6     | 0          | 0    | 0     | 0      | 0      |
| Rank 2 | 0     | 3          | 1    | 2     | 0      | 0      |
| Rank 3 | 0     | 3          | 2    | 1     | 0      | 0      |
| Rank 4 | 0     | 0          | 3    | 3     | 0      | 0      |
| Rank 5 | 0     | 0          | 0    | 0     | 6      | 0      |
| Rank 6 | 0     | 0          | 0    | 0     | 0      | 6      |
